# Supplementary material for: Substrate and stereocontrolled iodocycloetherification of highly functionalized enantiomerically pure allylic alcohols: application to synthesis of cytotoxic 2-epi jaspine B and its biological evaluation
Source: Royal Society of Chemistry journal article supplement (doi:10.1039/c5ob01123j), 2015-01-01
Supplement: c5ob01123j1.pdf [file c5ob01123j1.pdf]

## Supplementary Data

### **Substrate and stereocontrolled iodocycloetherification of highly functionalized enantiomerically pure allylic alcohols: Application to synthesis of 2-*epi* jaspine B and its biological evaluation.**

Somireddy Kundooru,<sup>a</sup> Pintu Das,<sup>a</sup> Sanjeev Meena,<sup>b</sup> Vikash Kumar<sup>c</sup>, Mohammad Imran Siddiqi<sup>c</sup>,  
Dipak Datta,<sup>b</sup> and Arun K Shaw<sup>\*a</sup>

#### **Contents:**

|                                                                              |              |
|------------------------------------------------------------------------------|--------------|
| 1. <sup>1</sup> H and <sup>13</sup> C data of Compound <b>4a</b>             | Page No – 2  |
| 2. HSQC data of compound <b>4a</b>                                           | Page No – 3  |
| 3. <sup>1</sup> H and <sup>13</sup> C data of Compound <b>4b</b>             | Page No – 4  |
| 4. HSQC data of compound <b>4b</b>                                           | Page No – 5  |
| 5. <sup>1</sup> H and <sup>13</sup> C data of Compound <b>6</b>              | Page No – 6  |
| 6. HSQC data of compound <b>6</b>                                            | Page No – 7  |
| 7. NOESY data of compound <b>6</b>                                           | Page No – 8  |
| 8. <sup>1</sup> H and <sup>13</sup> C data of Compound <b>8</b>              | Page No – 9  |
| 9. DEPT 90 and DEPT 135 data for compound <b>8</b>                           | Page No – 10 |
| 10. HSQC data of compound <b>8</b>                                           | Page No – 11 |
| 11. COSY, NOESY data of compound <b>8</b>                                    | Page No – 12 |
| 12. <sup>1</sup> H data of Compound <b>10</b>                                | Page No – 13 |
| 13. <sup>13</sup> C and DEPT 90 data of Compound <b>10</b>                   | Page No – 14 |
| 14. DEPT 135 and HSQC data of Compound <b>10</b>                             | Page No – 15 |
| 15. COSY, NOESY data of compound <b>10</b>                                   | Page No – 16 |
| 16. NOESY data of compound <b>10</b>                                         | Page No – 17 |
| 17. <sup>1</sup> H and <sup>13</sup> C data of Compound <b>11</b>            | Page No – 18 |
| 18. <sup>1</sup> H and <sup>13</sup> C data of Compound <b>12</b>            | Page No – 19 |
| 19. <sup>1</sup> H and <sup>13</sup> C data of <b>2-<i>epi</i> jaspine B</b> | Page No – 20 |
| 20. <sup>1</sup> H and <sup>13</sup> C spectra of compound <b>13</b>         | Page No – 21 |
| 21. <sup>1</sup> H and <sup>13</sup> C spectra of compound <b>14</b>         | Page No – 22 |
| 22. <sup>1</sup> H and <sup>13</sup> C spectra of compound <b>15</b>         | Page No – 23 |

---

\*Corresponding author. Tel.: +919415403775; fax: +91(522)2623405; e-mail: [akshaw55@yahoo.com](mailto:akshaw55@yahoo.com)

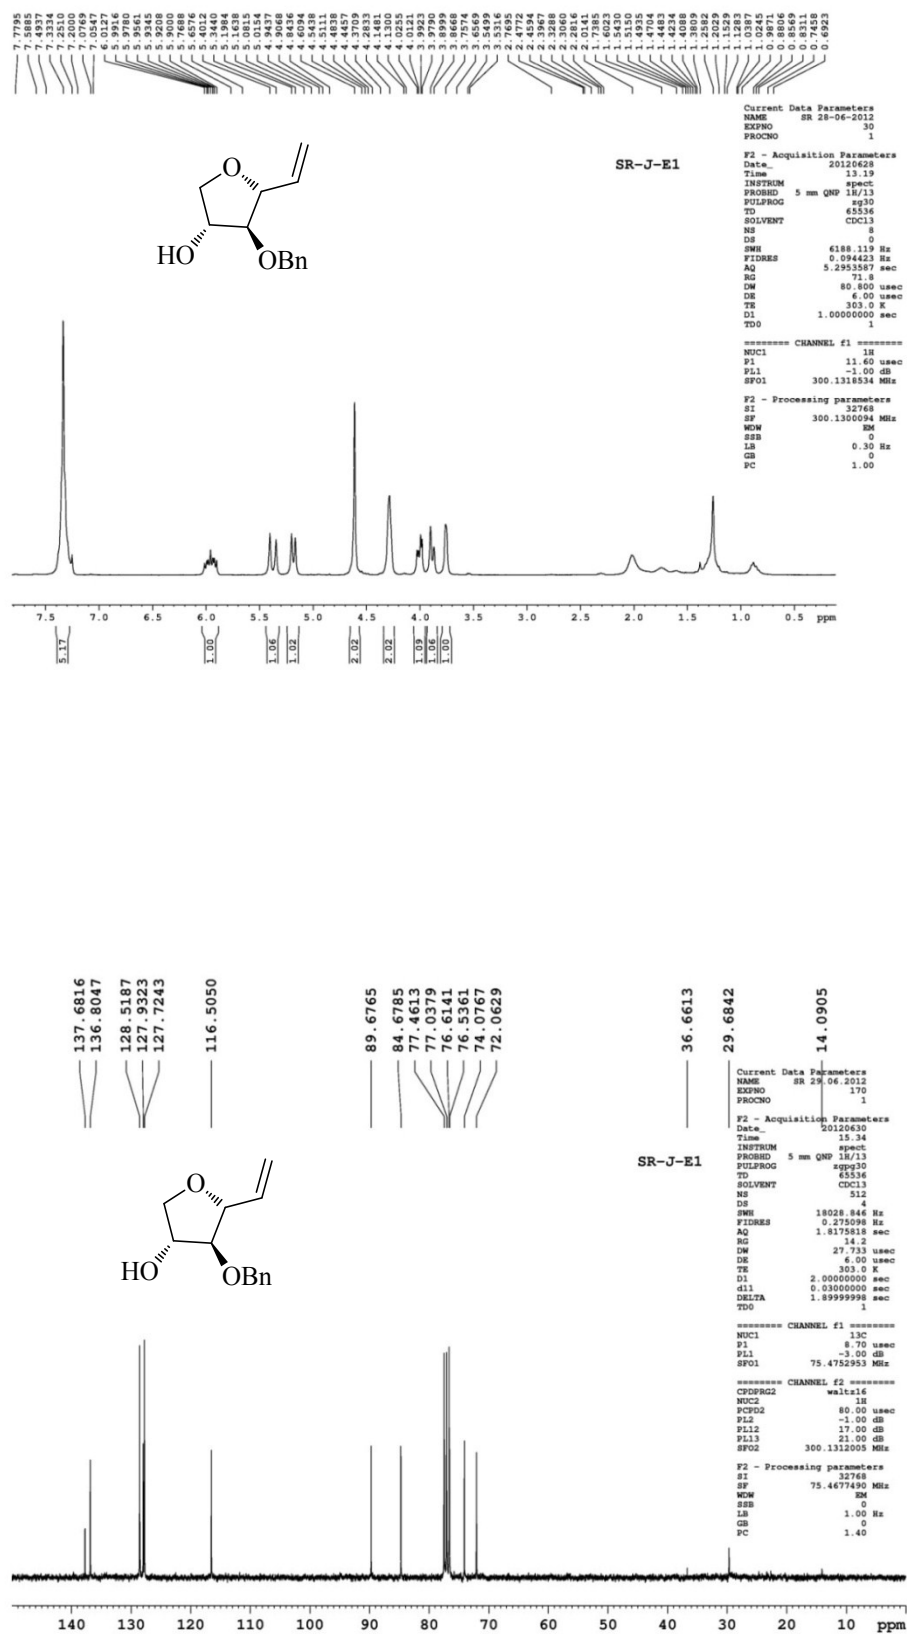

1H and 13C spectra of compound **4a**

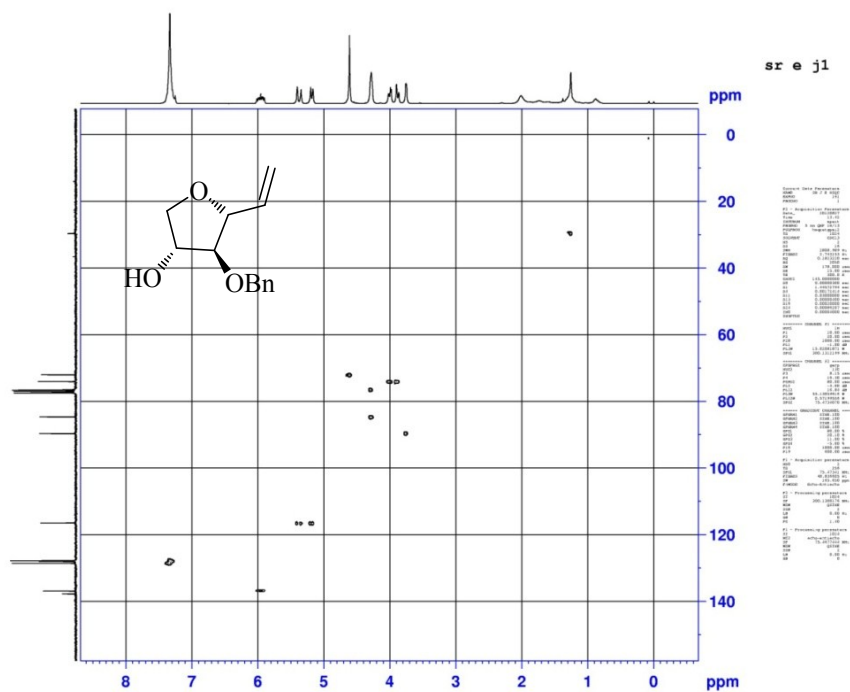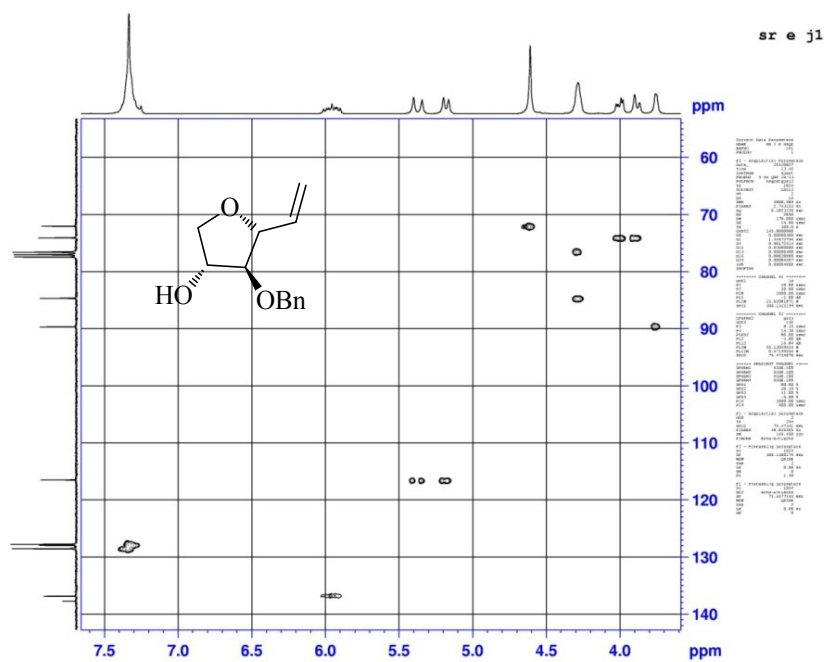

HSQC spectrum for compound 4a

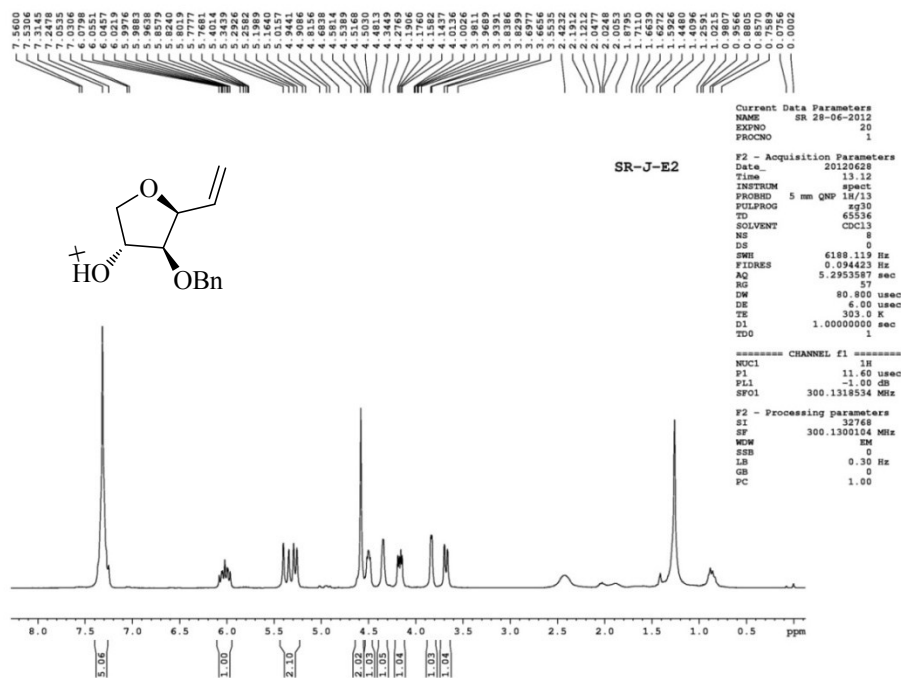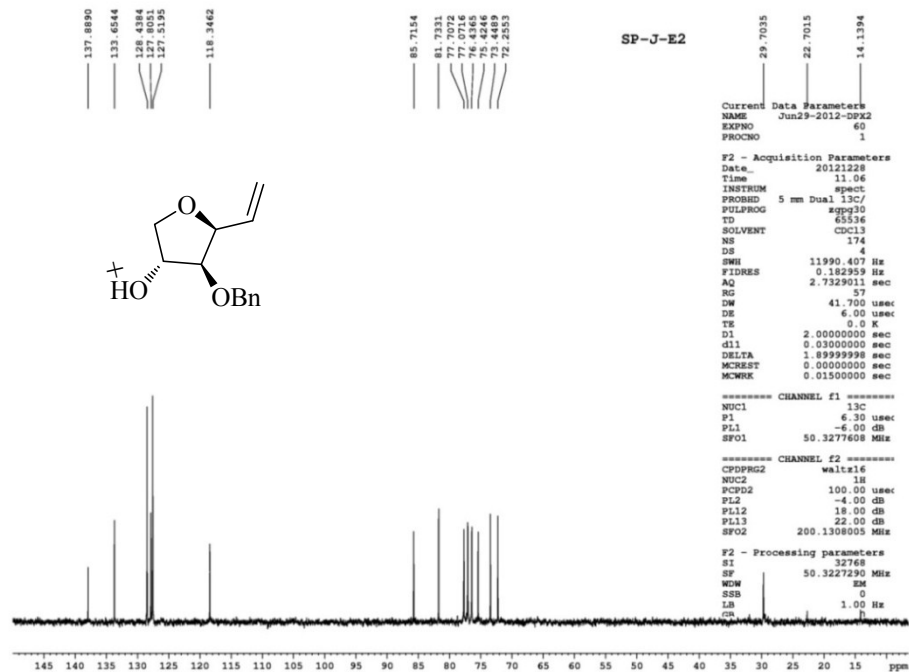

**<sup>1</sup>H and <sup>13</sup>C spectra of compound 4b**

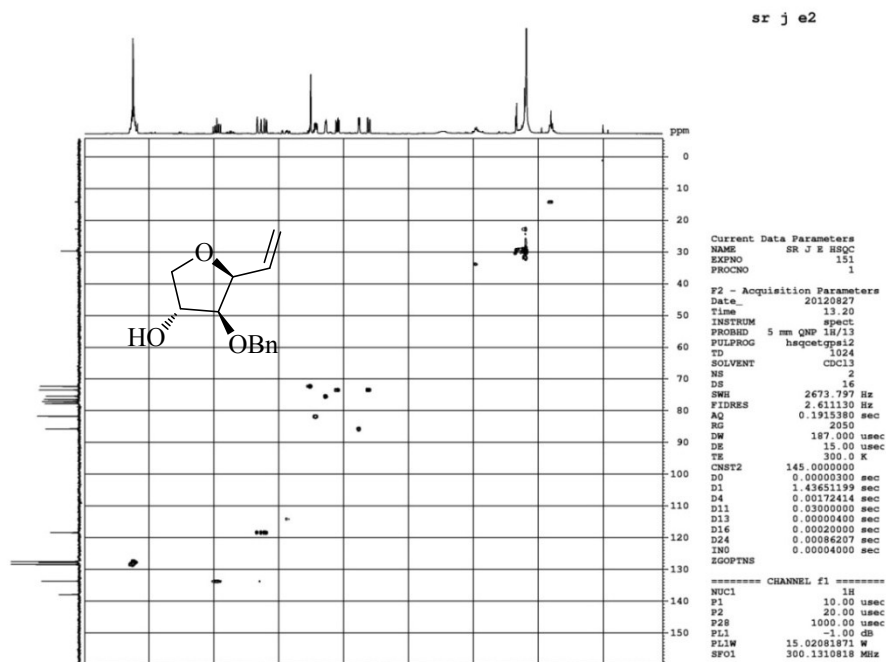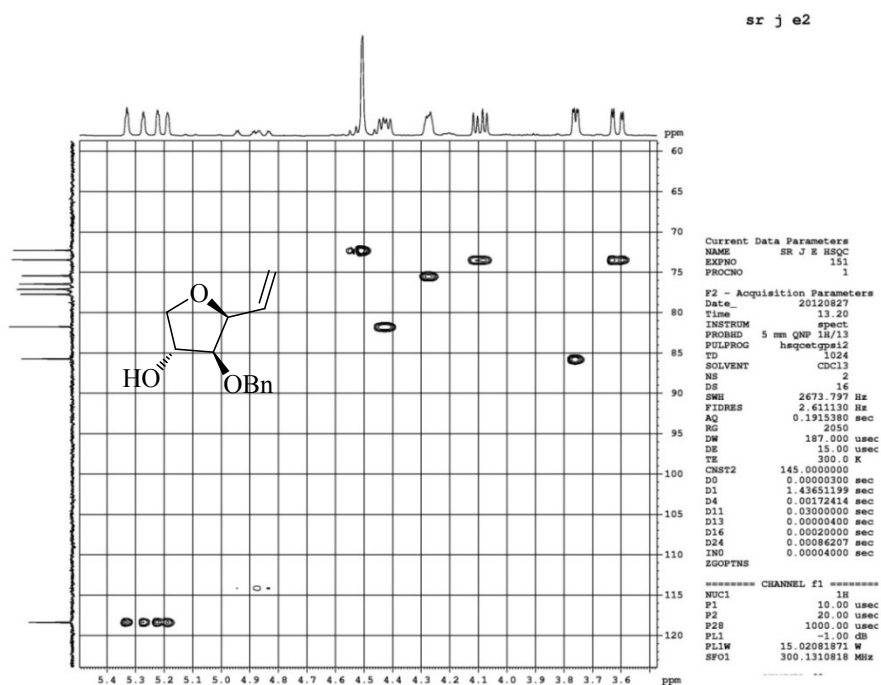

HSQC spectra of compound 4b

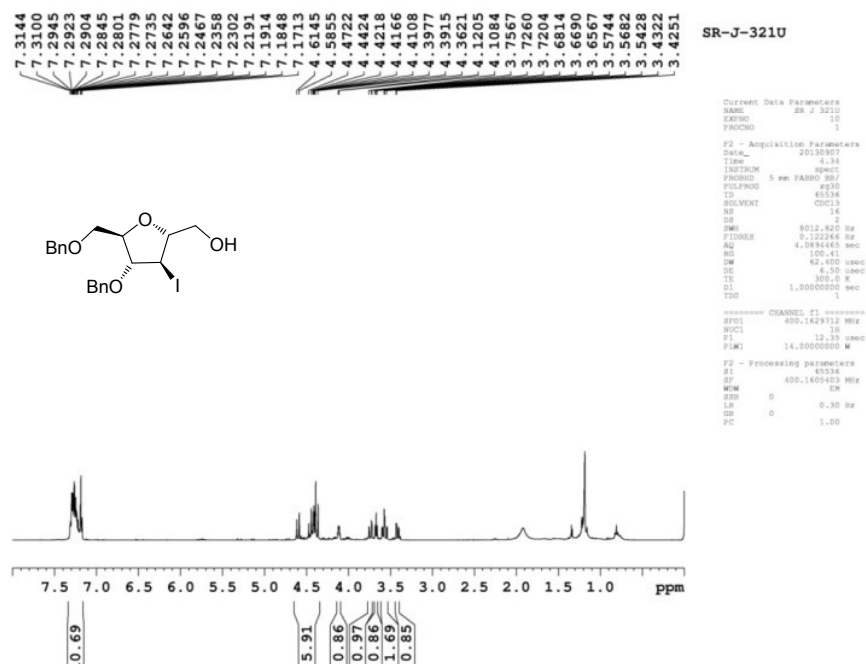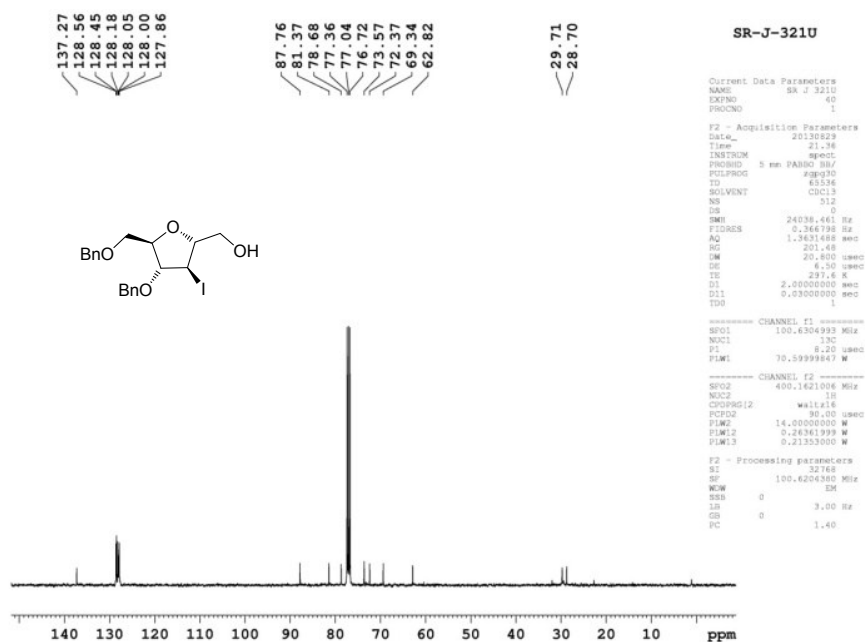

**<sup>1</sup>H and <sup>13</sup>C spectra of compound 6**

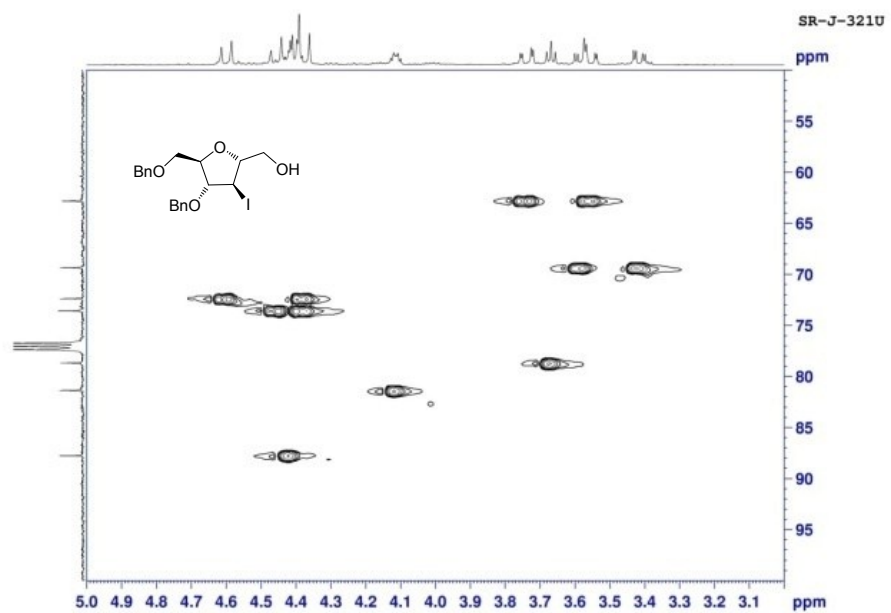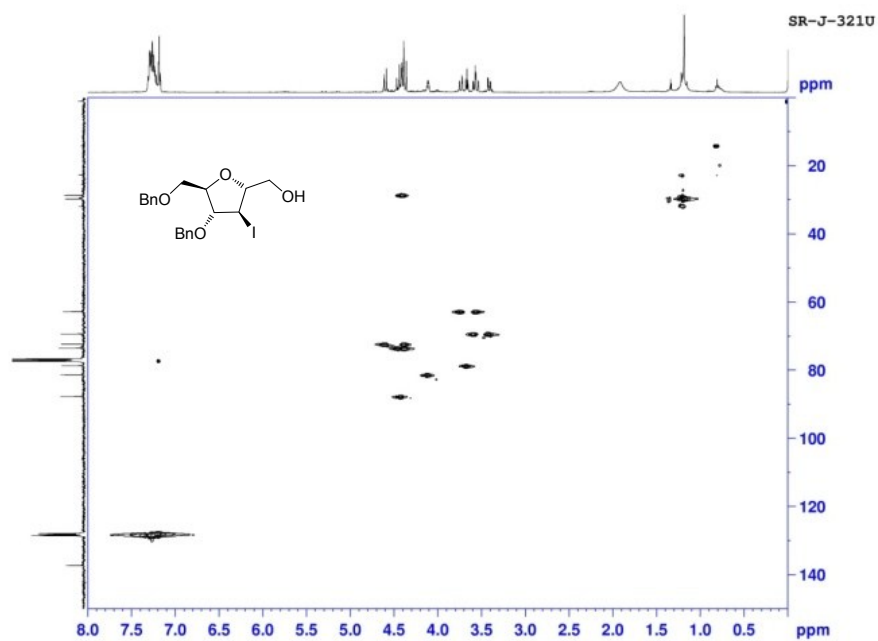

HSQC spectrum for compound 6

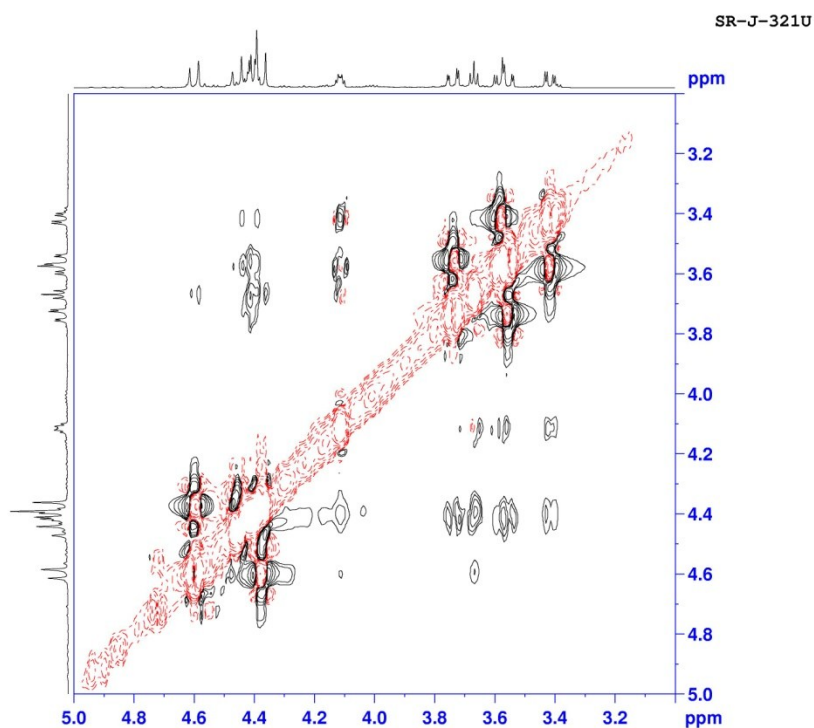

## NOESY Spectrum for the compound 6

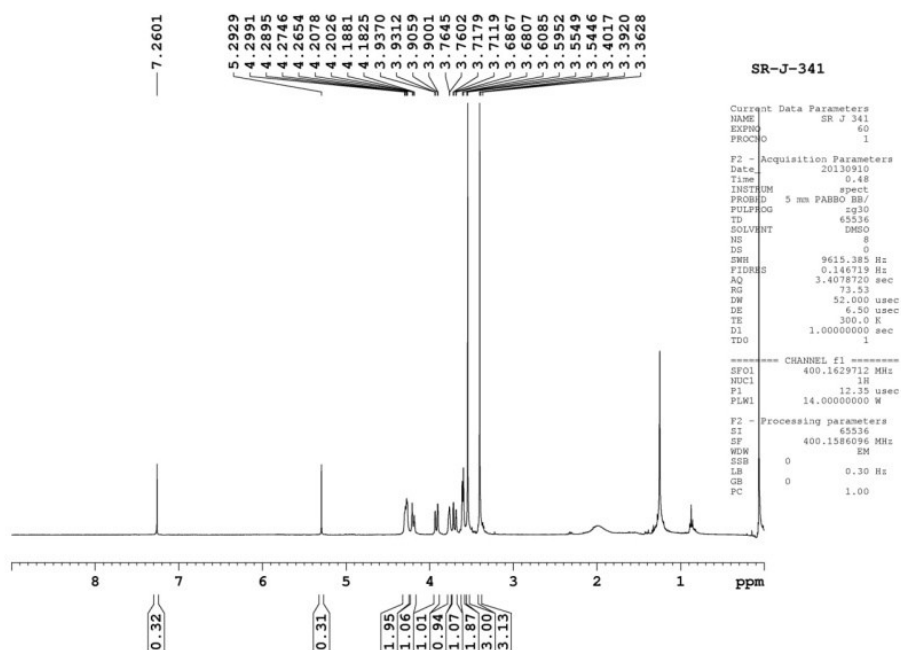



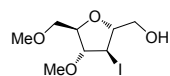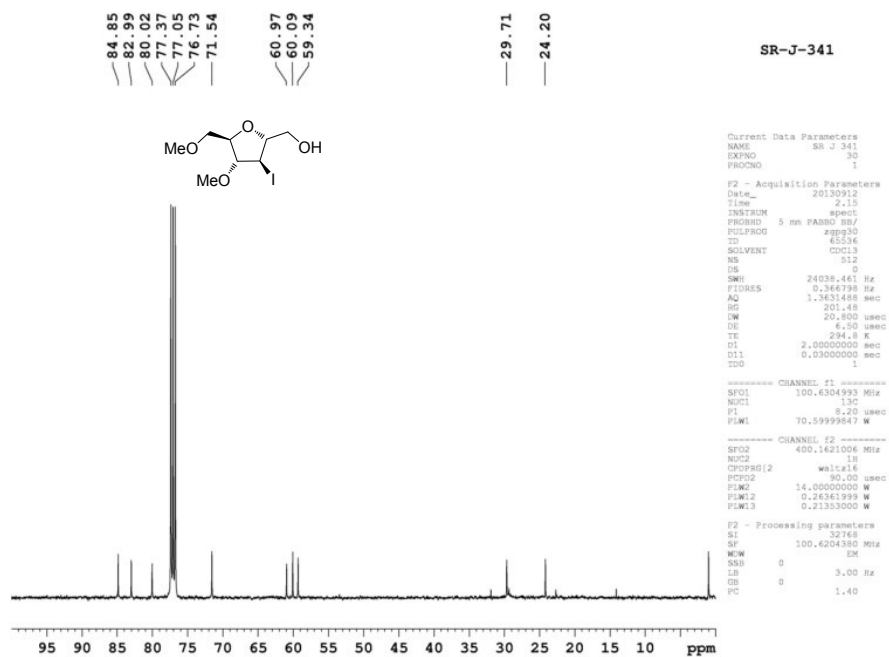

<sup>1</sup>H, <sup>13</sup>C spectrum for compound **8**



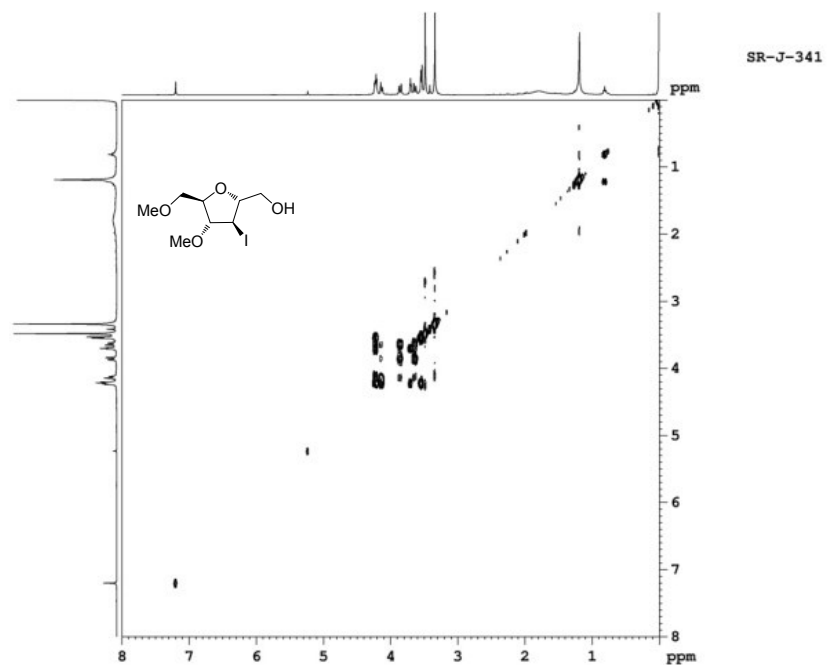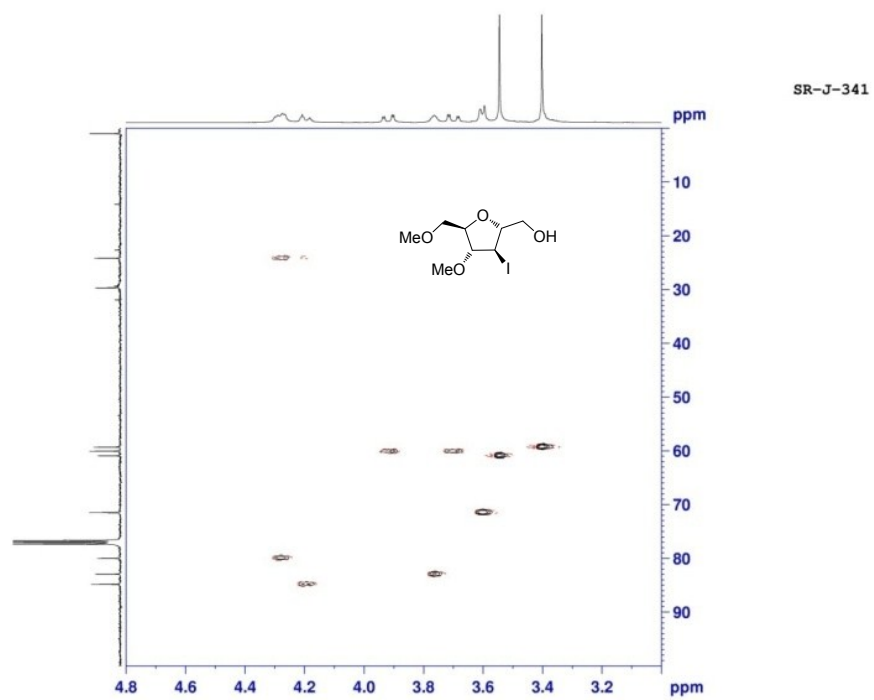

HSQC Spectrum for the compound **8**



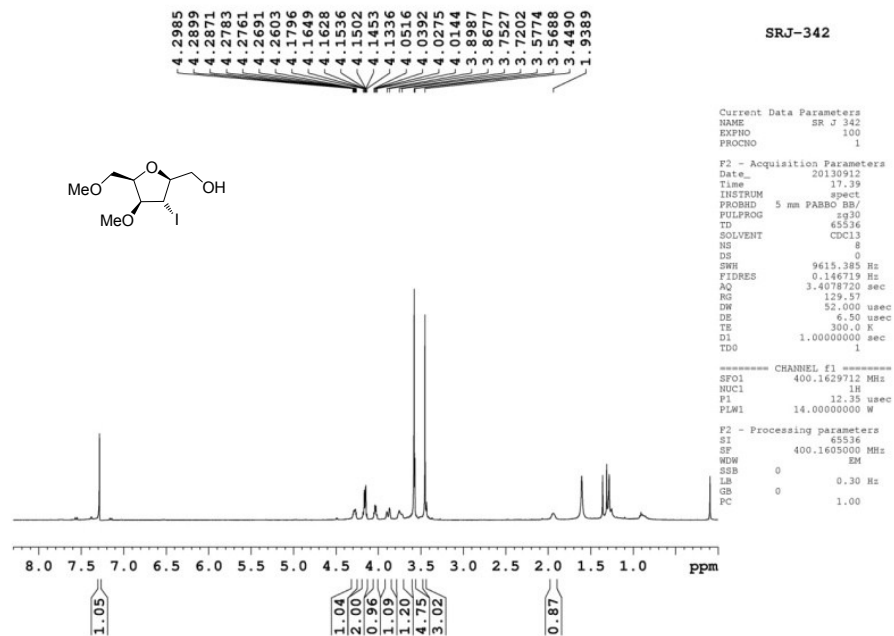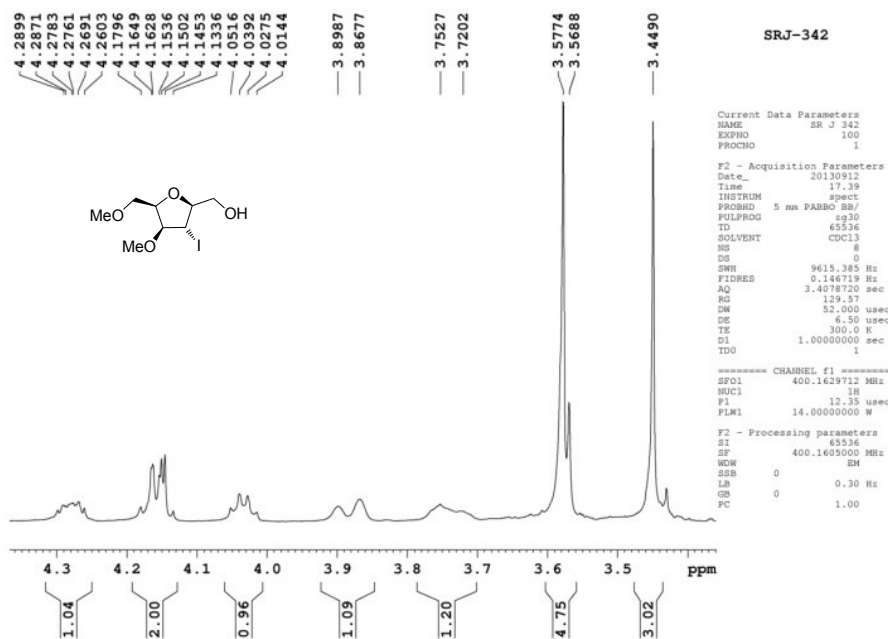

<sup>1</sup>H spectrum for compound 10

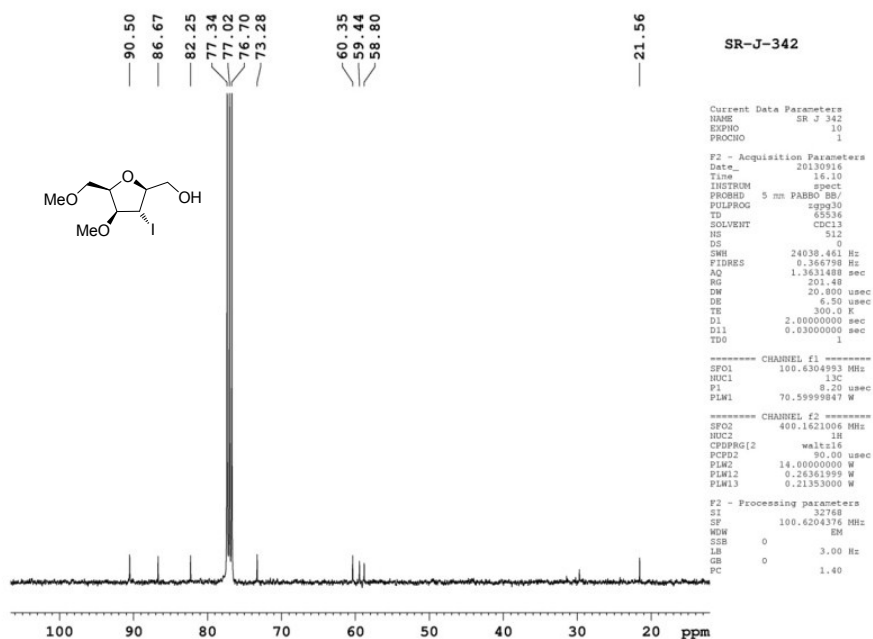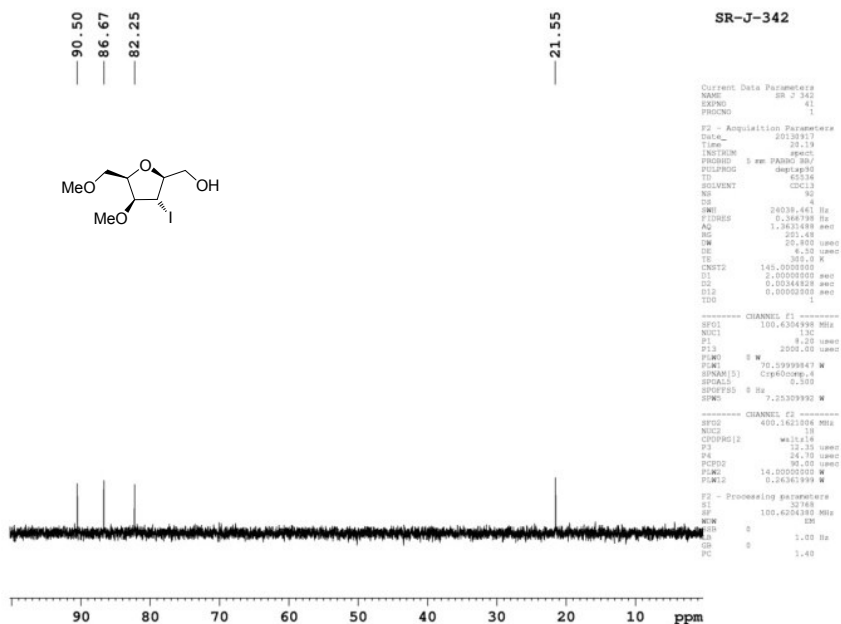

13C and DEPT 90 spectrum for compound 10



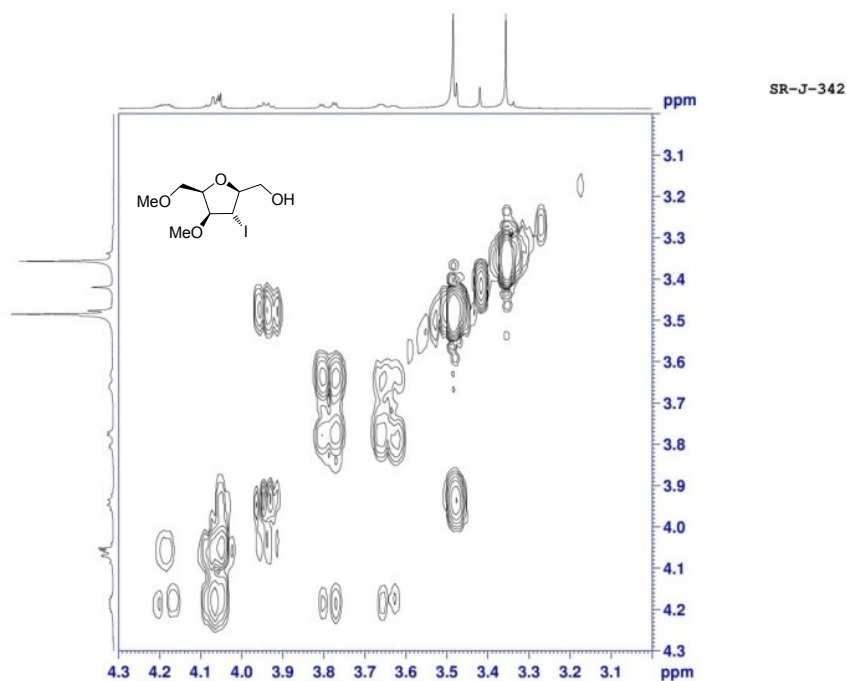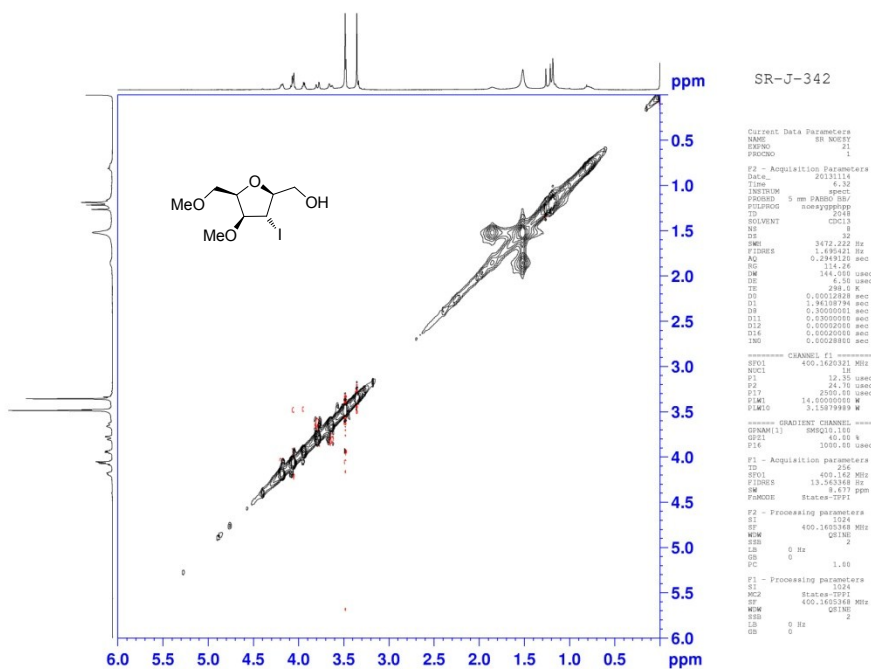

COSY, NOESY spectrum for compound 10



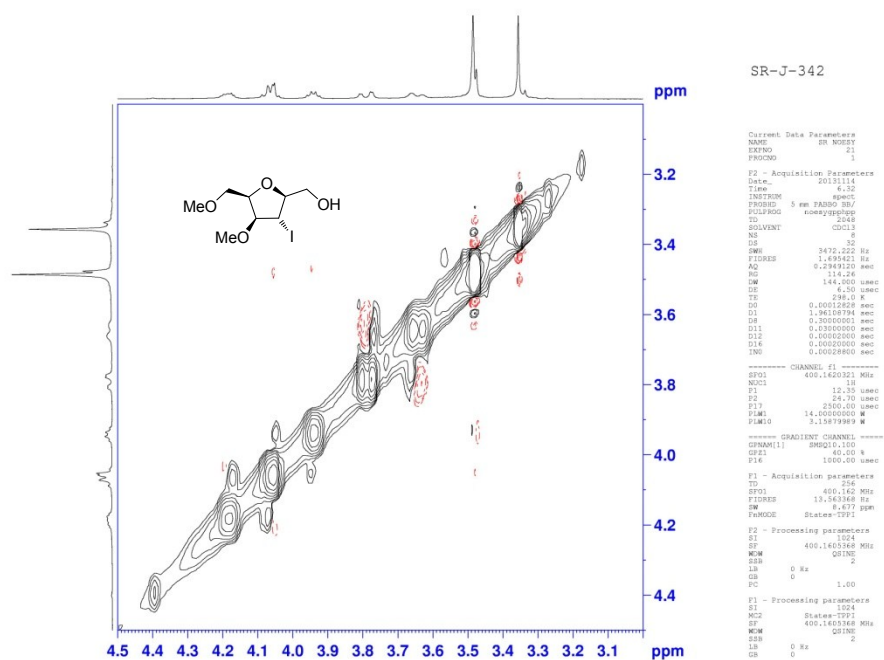

NOESY Data for compound 10

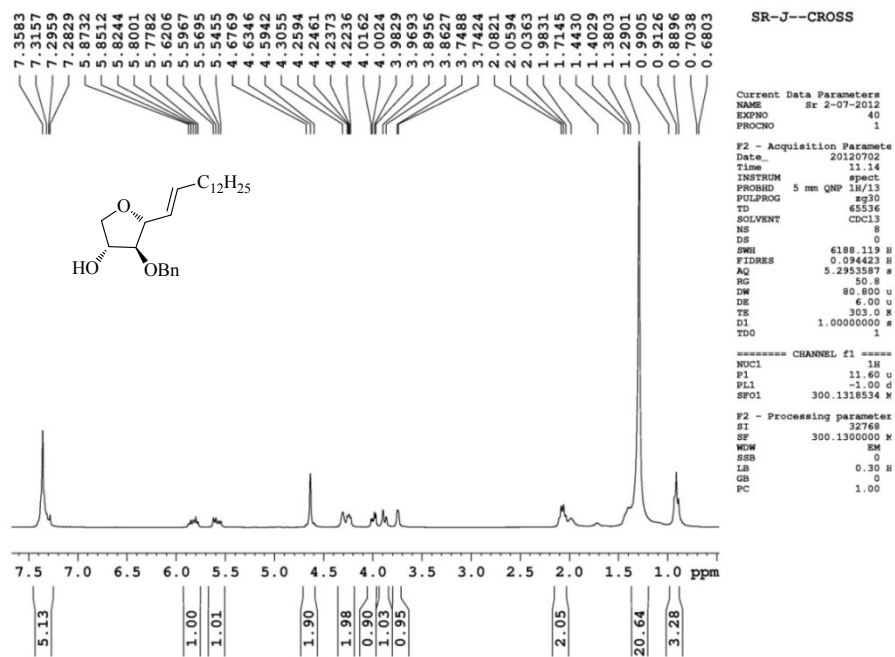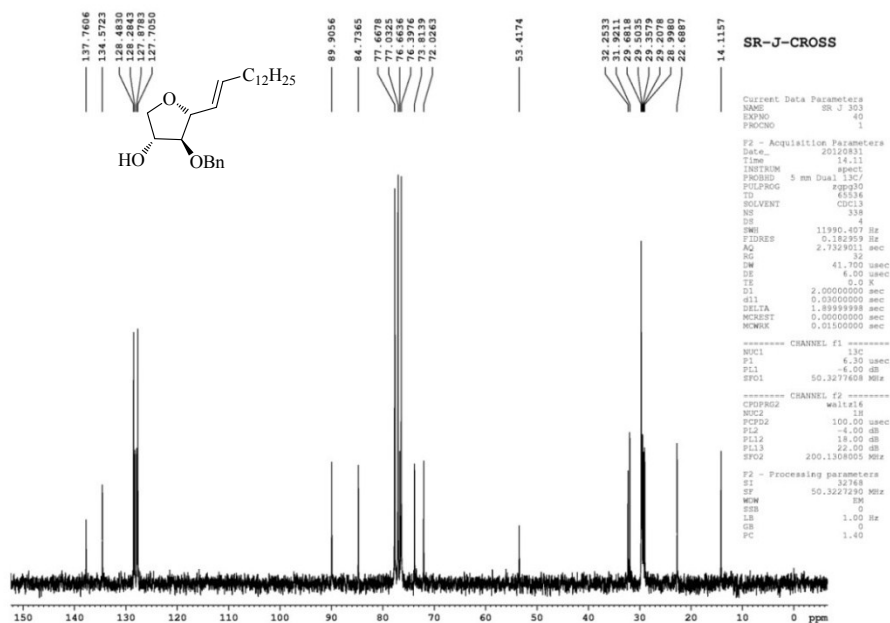

1H  
and 13C spectra of compound 11

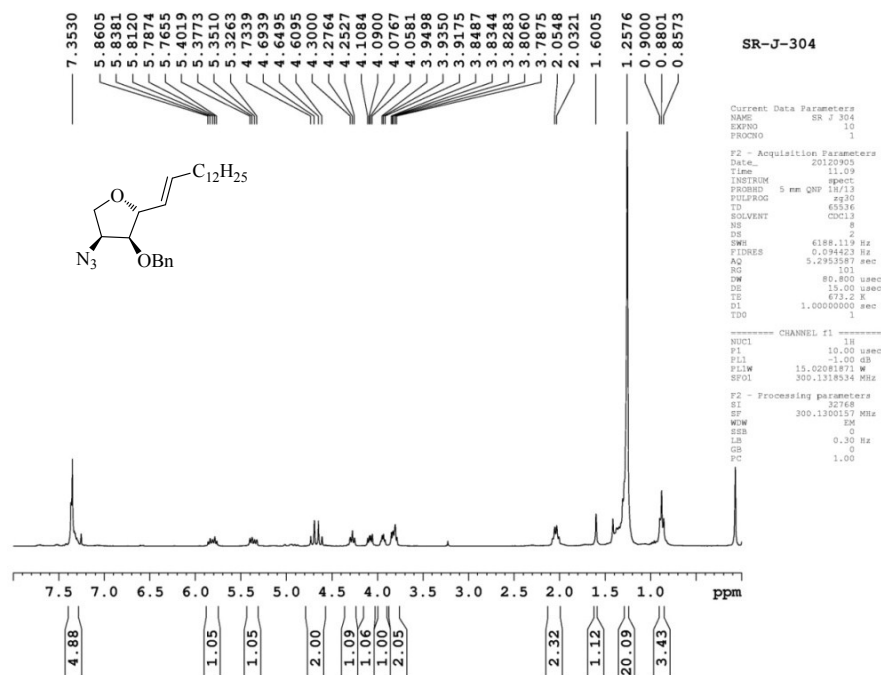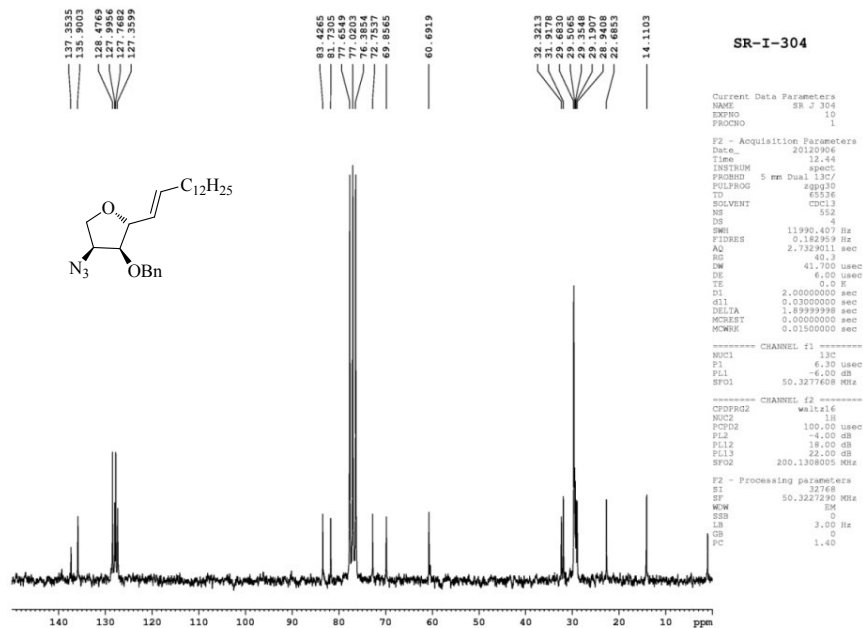

**<sup>1</sup>H and <sup>13</sup>C spectra of compound 12**

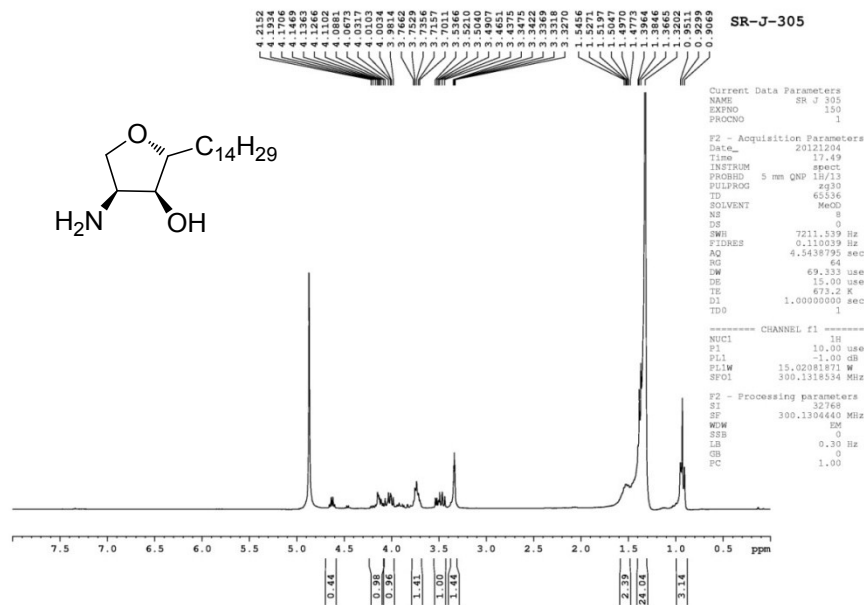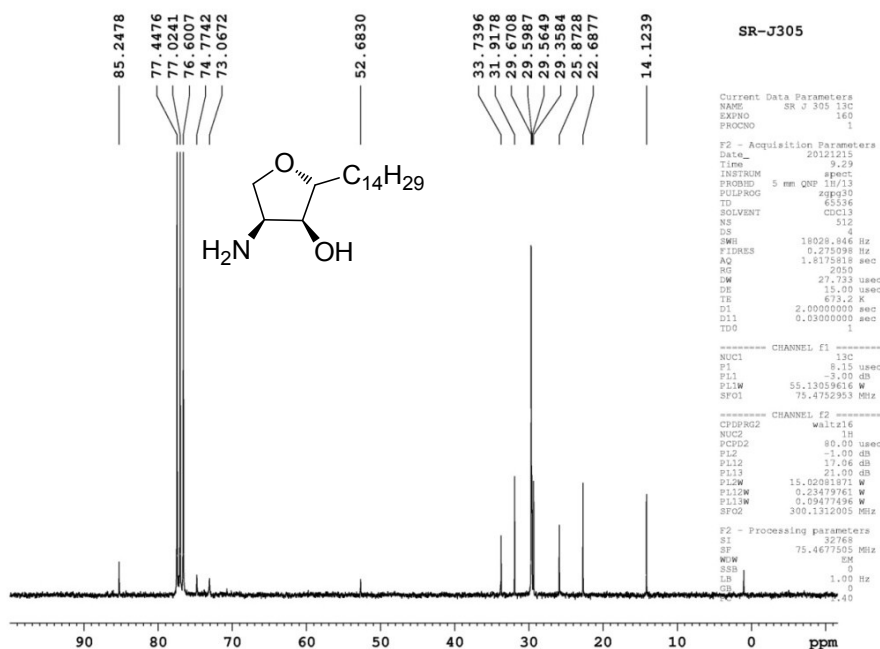

1H and 13C spectra of compound **2-*epi* jaspine B**

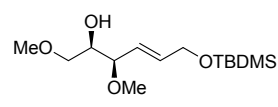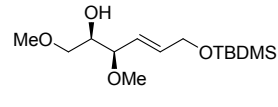

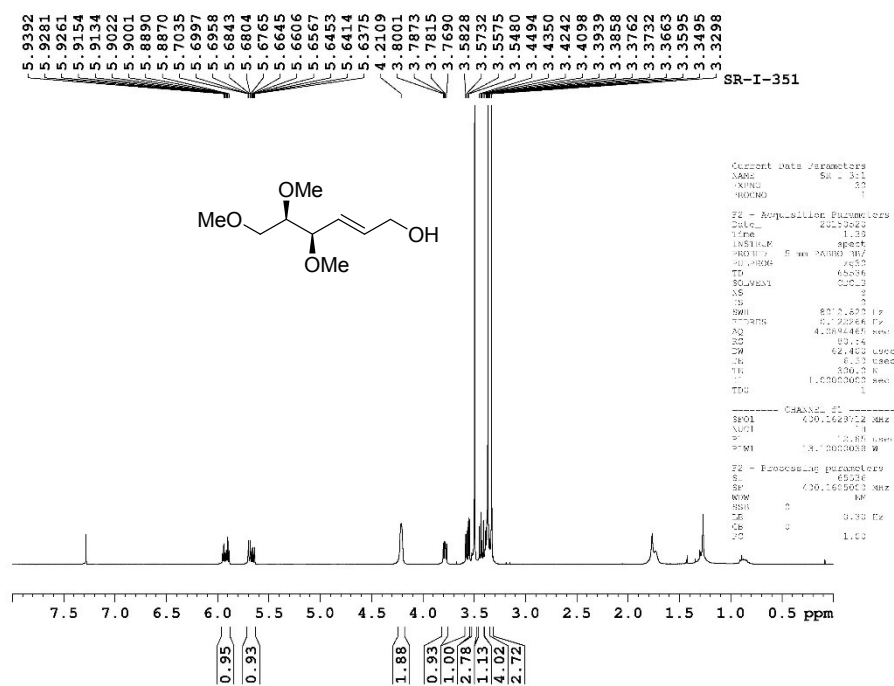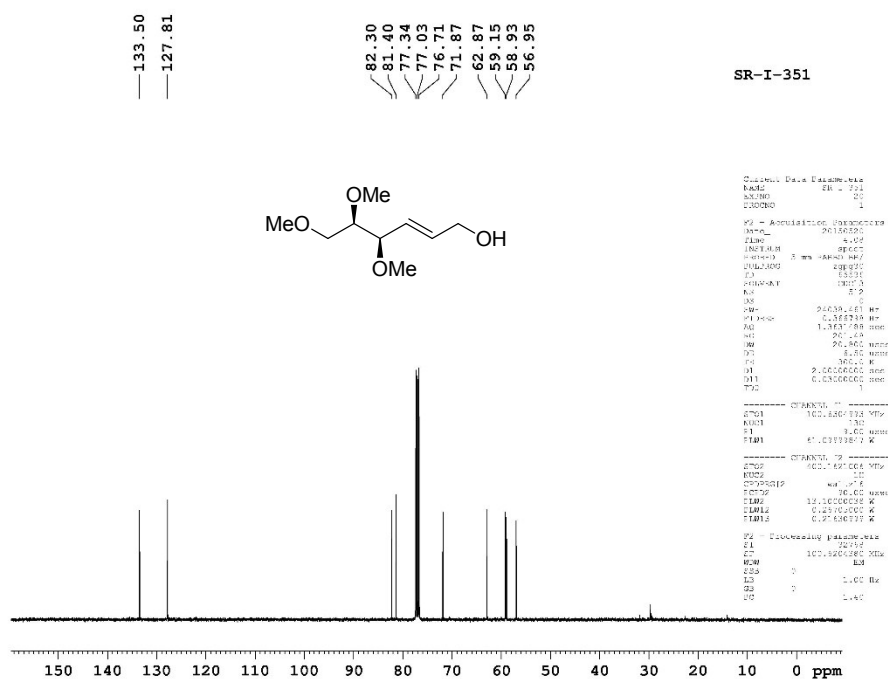

<sup>1</sup>H and <sup>13</sup>C spectra of compound 14
